# Supplementary material for: 2D WSe2 Flakes for Synergistic Modulation of Grain Growth and Charge Transfer in Tin‐Based Perovskite Solar Cells
Source: PubMed Central journal article supplement (PMC8188186; doi:10.1002/advs.202004315), 2021-03-27
Supplement: ADVS-8-2004315-s001.pdf [file ADVS-8-2004315-s001.pdf]

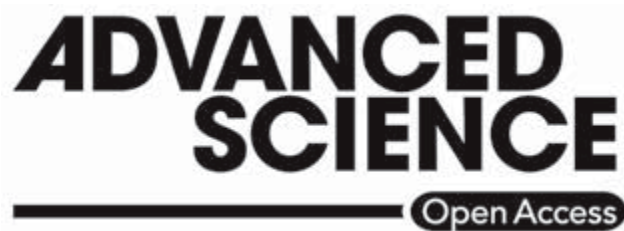

## Supporting Information

for *Adv. Sci.*, DOI: 10.1002/adv.202004315

### 2D WSe<sub>2</sub> Flakes for Synergistic Modulation of Grain Growth and Charge Transfer in Tin-based Perovskite Solar Cells

*Tianyue Wang, Fangyuan Zheng, Guanqi Tang, Jiupeng Cao, Peng You, Jiong Zhao, and  
Prof. Feng Yan\**

Supporting Information

**2D WSe<sub>2</sub> flakes for synergistic modulation of grain growth and charge transfer in tin-based perovskite solar cells**

*Tianyue Wang, Fangyuan Zheng, Guanqi Tang, Jiupeng Cao, Peng You, Jiong Zhao, and Feng Yan\**

T. Y. Wang, F. Y. Zheng, G. Q. Tang, J. P. Cao, P. You, J. Zhao, Prof. F. Yan  
Department of Applied Physics, The Hong Kong Polytechnic University, Hung Hom,  
Kowloon, Hong Kong  
E-mail: apafyan@polyu.edu.hk

## Figures:

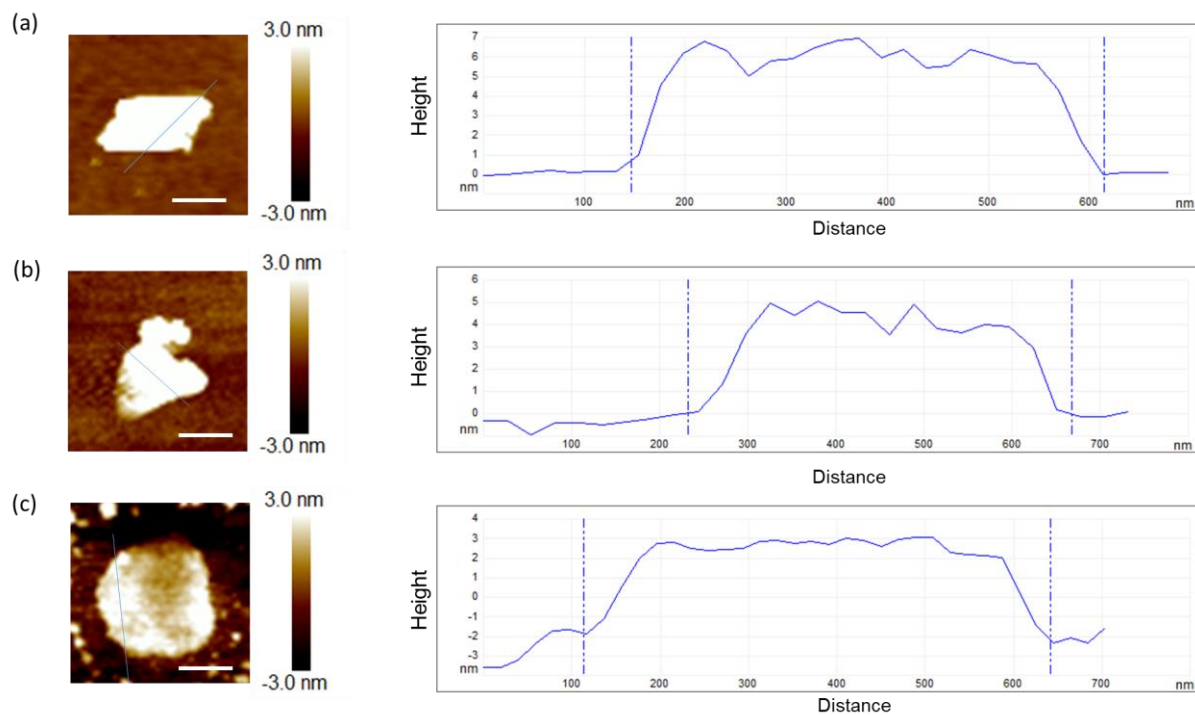

Figure S1 Representative AFM images of a) MoS<sub>2</sub>, b) WS<sub>2</sub> and c) WSe<sub>2</sub> flakes deposited on Si substrates. Scale bar: 300 nm. The height profiles on the right were extracted from the indicated blue lines in the AFM images.

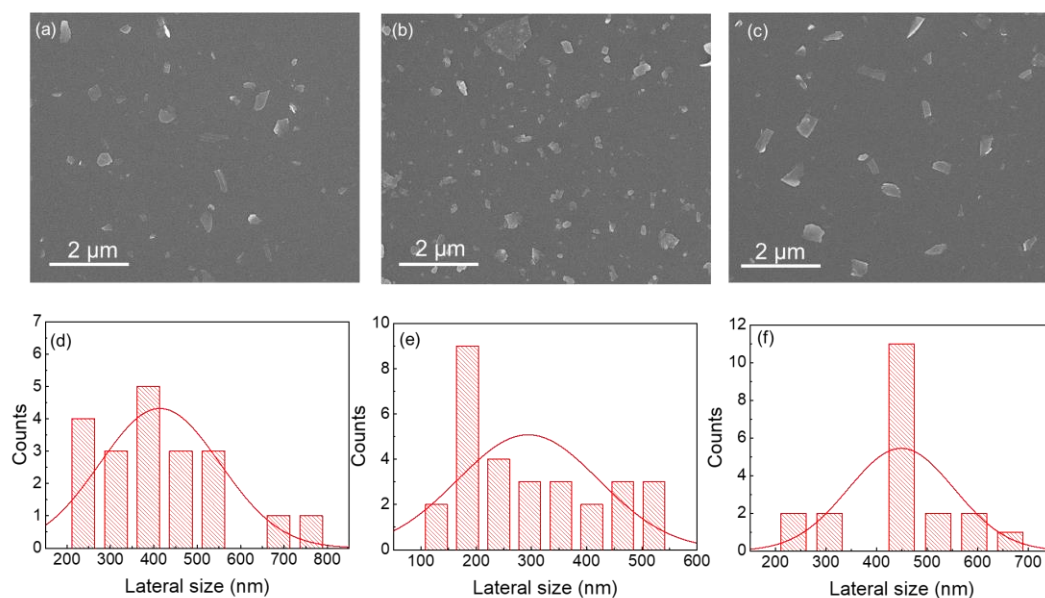

Figure S2 SEM images of as-exfoliated a) MoS<sub>2</sub>, b) WS<sub>2</sub> and c) WSe<sub>2</sub> flakes spin-coated on Si-substrates. Lateral size distributions of d) MoS<sub>2</sub>, e) WS<sub>2</sub> and f) WSe<sub>2</sub> flakes extracted from a-c).

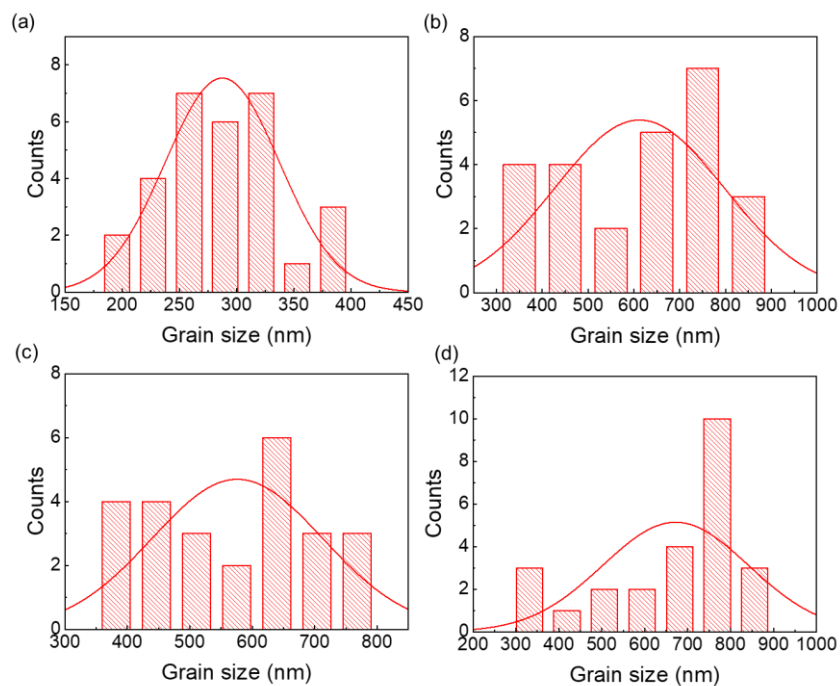

Figure S3 Statistical grain size distribution of  $\text{FASnI}_3$  films deposited on a)  $\text{NiO}_x/\text{ITO}$ , as well as b)  $\text{MoS}_2$ , c)  $\text{WS}_2$ , and d)  $\text{WSe}_2$  modified  $\text{NiO}_x/\text{ITO}$ .

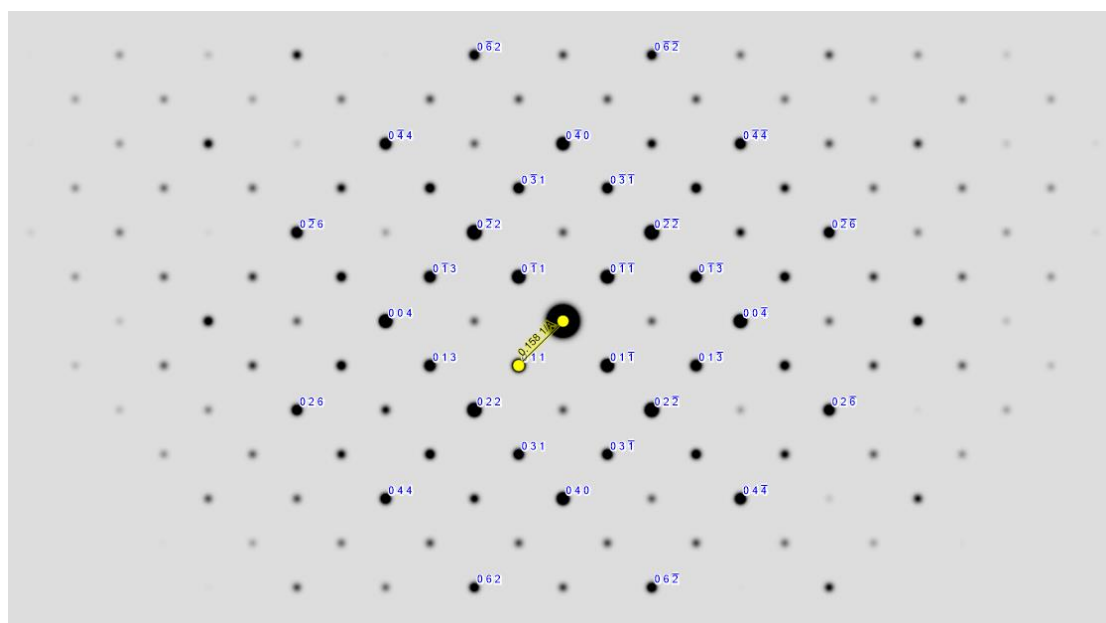

Figure S4 Simulated transmission electron diffraction of  $\text{FASnI}_3$  single crystal from view direction of indices  $[100]$ . The simulation was performed by CrystalMaker and SingleCrystal Softwares according to the CIF of  $\text{FASnI}_3$  (orthorhombic  $\text{Amm}2$  space group).

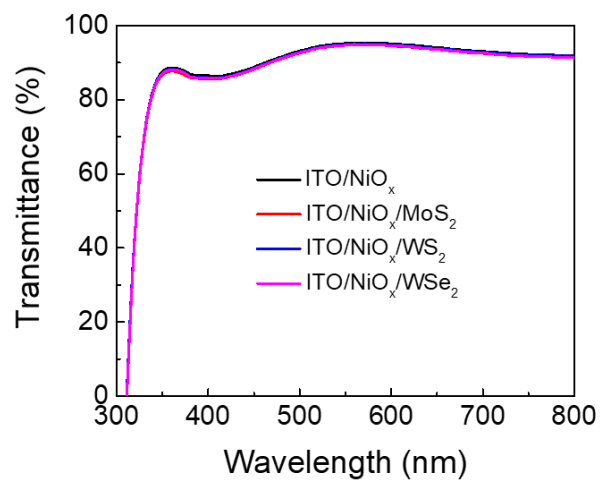

Figure S5 Transmittance spectra of NiO<sub>x</sub>/ITO/glass substrates processed w/o and with MX<sub>2</sub> interlayer.

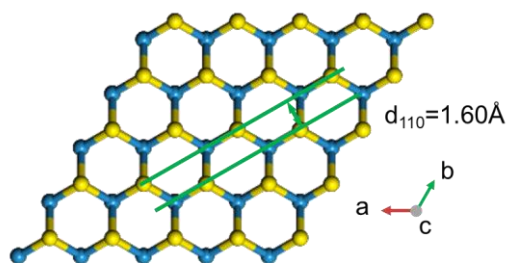

Figure S6 Atomic crystal structure of the (110) plane of WSe<sub>2</sub> from the top view.

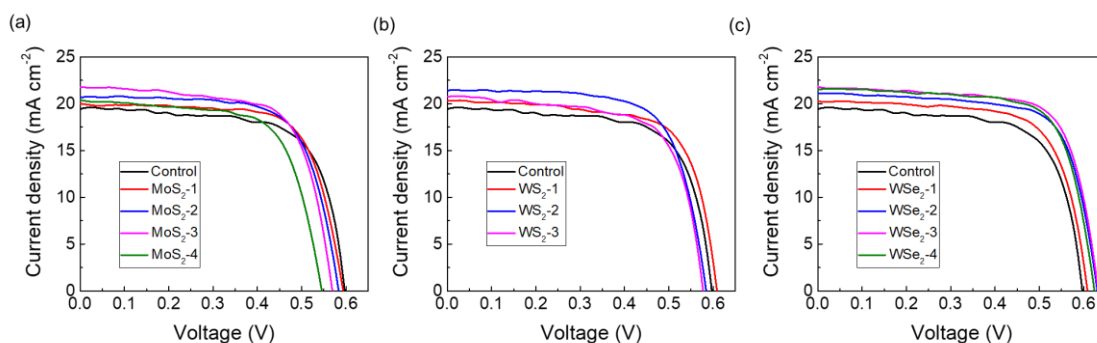

Figure S7 Typical J-V curves of the control PSC and  $\text{MX}_2$ -incorporated PSCs prepared by spin-coating  $\text{MX}_2$  dispersions for different times.

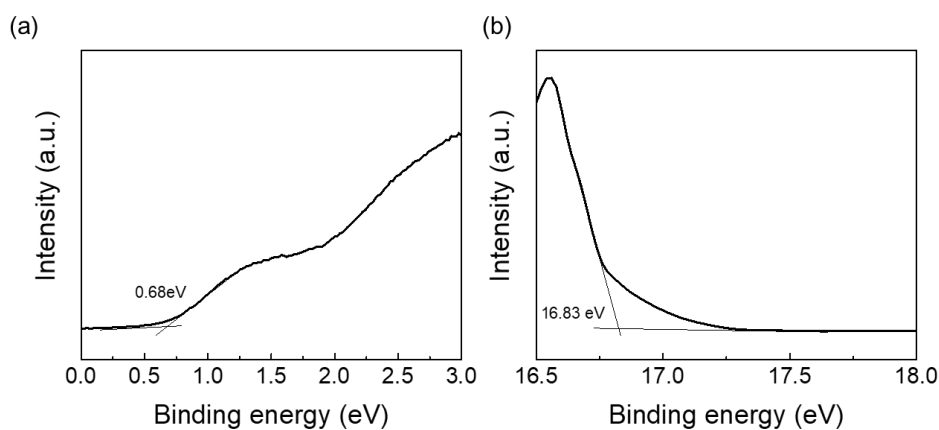

Figure S8 a) Near  $E_f$  region and b) the secondary electron cutoff region of UPS spectra of the  $\text{FASnI}_3$  perovskite film.

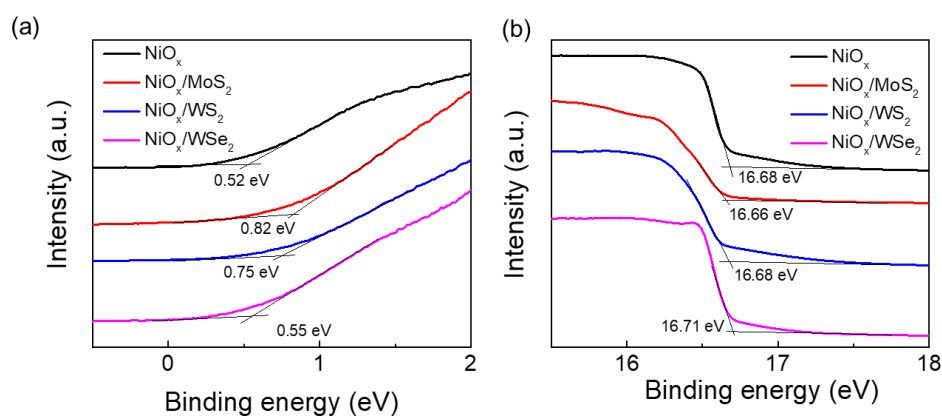

Figure S9 a) Near  $E_f$  region and b) the secondary electron cutoff region of UPS spectra of the  $\text{NiO}_x$  layer and  $\text{MX}_2$  modified  $\text{NiO}_x$  layers.

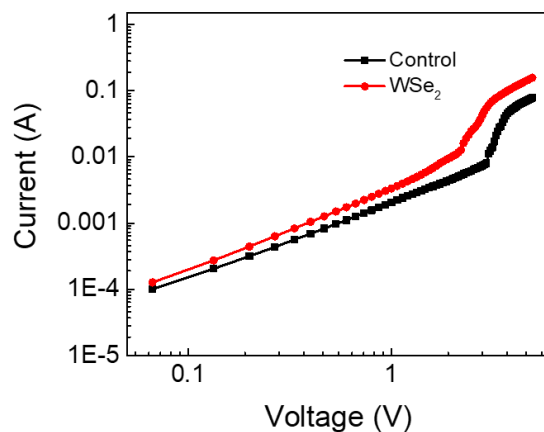

Figure S10 Dark I-V curves of the hole-only devices w/o and with WSe<sub>2</sub> incorporation.

Note: Hole-only devices with a structure of ITO/NiO<sub>x</sub>/w/o or with WSe<sub>2</sub>/FASnI<sub>3</sub>/P3HT/Au were used to measure the dark I-V curves. The trap density ( $N_t$ ) in the perovskite film can be calculated by the equation:

$$N_t = \frac{2\varepsilon\varepsilon_0V_{TFL}}{qL^2}$$

where  $V_{TFL}$  is the trap filled limit voltage,  $\varepsilon$  is the relative dielectric constant of FASnI<sub>3</sub> (~5.7),  $\varepsilon_0$  is the vacuum permittivity,  $q$  is the electron charge, and  $L$  is the perovskite film thickness.

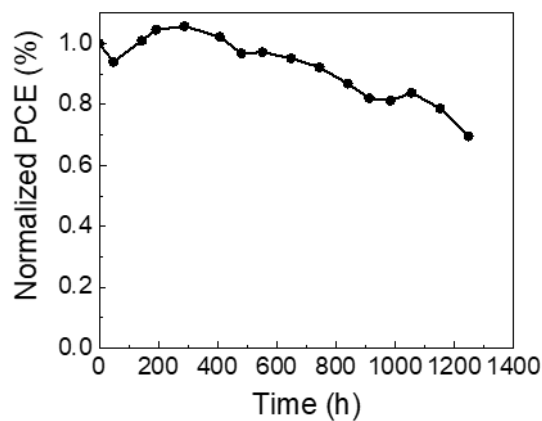

Figure S11 Long-term stability of the WSe<sub>2</sub> incorporated PSC (unencapsulated) when stored in the air with a relative humidity (RH) about 20% and measured in the ambient condition (RH≈45%).

## Tables:

Table S1 Photovoltaic parameters of MX<sub>2</sub> processed PSCs (MX<sub>2</sub> dispersions were spin-coated for different times) extracted from Figure S7.

|                          | V <sub>oc</sub> (v) | J <sub>sc</sub> (mA cm <sup>-2</sup> ) | FF (%) | PCE (%) |
|--------------------------|---------------------|----------------------------------------|--------|---------|
| <b>Control</b>           | 0.59                | 19.44                                  | 70.0   | 8.03    |
| <b>MoS<sub>2</sub>-1</b> | 0.59                | 20.02                                  | 71.0   | 8.39    |
| <b>MoS<sub>2</sub>-2</b> | 0.58                | 20.67                                  | 70.4   | 8.44    |
| <b>MoS<sub>2</sub>-3</b> | 0.57                | 21.75                                  | 68.7   | 8.52    |
| <b>MoS<sub>2</sub>-4</b> | 0.54                | 20.40                                  | 67.8   | 7.47    |
| <b>WS<sub>2</sub>-1</b>  | 0.61                | 20.32                                  | 69.8   | 8.65    |
| <b>WS<sub>2</sub>-2</b>  | 0.58                | 21.44                                  | 70.4   | 8.75    |
| <b>WS<sub>2</sub>-3</b>  | 0.58                | 20.71                                  | 69.9   | 8.39    |
| <b>WSe<sub>2</sub>-1</b> | 0.61                | 20.27                                  | 70.0   | 8.66    |
| <b>WSe<sub>2</sub>-2</b> | 0.63                | 21.14                                  | 71.9   | 9.56    |
| <b>WSe<sub>2</sub>-3</b> | 0.63                | 21.82                                  | 72.0   | 9.90    |
| <b>WSe<sub>2</sub>-4</b> | 0.62                | 21.54                                  | 72.4   | 9.67    |

Table S2 Efficiencies of FASnI<sub>3</sub>-based PSCs in literature.

| Composition                                                              | Device structure                                                        | PCE (%) | Ref       |
|--------------------------------------------------------------------------|-------------------------------------------------------------------------|---------|-----------|
| FASnI <sub>3</sub> (SnF <sub>2</sub> )                                   | FTO/c-TiO <sub>2</sub> /mp-TiO <sub>2</sub> /perovskite/spiro-OMeTAD/Au | 2.1     | [1]       |
| FASnI <sub>3</sub> (SnF <sub>2</sub> , N <sub>2</sub> H <sub>5</sub> Cl) | ITO/PEDOT:PSS/perovskite/PCBM/BCP/Ag                                    | 5.4     | [2]       |
| FASnI <sub>3</sub> (SnF <sub>2</sub> )                                   | ITO/PEDOT:PSS/perovskite/C <sub>60</sub> /BCP/Ag                        | 6.22    | [3]       |
| FASnI <sub>3</sub> (SnF <sub>2</sub> , TMA)                              | ITO/PEDOT:PSS/perovskite/C <sub>60</sub> / bis-C <sub>60</sub> /Ag      | 7.09    | [4]       |
| FASnI <sub>3</sub> (SnF <sub>2</sub> , pyrazine)                         | FTO/c-TiO <sub>2</sub> /mp-TiO <sub>2</sub> /perovskite/spiro-OMeTAD/Au | 4.8     | [5]       |
| FASnI <sub>3</sub> (SnF <sub>2</sub> , EDAL <sub>2</sub> )               | ITO/PEDOT:PSS/ perovskite/C <sub>60</sub> /BCP/Ag                       | 8.9     | [6]       |
| FASnI <sub>3</sub> (SnF <sub>2</sub> , PTN-Br)                           | ITO/PEDOT:PSS/perovskite/C <sub>60</sub> /BCP/Ag                        | 7.94    | [7]       |
| FASnI <sub>3</sub> (SnF <sub>2</sub> , FOEI)                             | ITO/PEDOT:PSS/ perovskite/C <sub>60</sub> /BCP/Ag                       | 10.16   | [8]       |
| FASnI <sub>3</sub> (SnF <sub>2</sub> , EDAP <sub>2</sub> )               | ITO/PEDOT:PSS/ perovskite/C <sub>60</sub> /BCP/Ag                       | 6.8     | [9]       |
| FASnI <sub>3</sub> (SnF <sub>2</sub> , PHCl)                             | ITO/PEDOT:PSS/ perovskite/C <sub>60</sub> /BCP/Ag                       | 11.4    | [10]      |
| FASnI <sub>3</sub> (SnF <sub>2</sub> , PAI)                              | ITO/PEDOT:PSS/ perovskite/C <sub>60</sub> /BCP/Ag                       | 11.22   | [11]      |
| FASnI <sub>3</sub> (SnCl <sub>2</sub> , GA)                              | ITO/NiO <sub>x</sub> /WSe <sub>2</sub> /perovskite/PCBM/BCP/Ag          | 10.47   | This work |

## References:

- [1] T. M. Koh, T. Krishnamoorthy, N. Yantara, C. Shi, W. L. Leong, P. P. Boix, A. C. Grimsdale, S. G. Mhaisalkar, N. Mathews, *J. Mater. Chem. A* **2015**, *3*, 14996.
- [2] M. E. Kayesh, T. H. Chowdhury, K. Matsuiishi, R. Kaneko, S. Kazaoui, J.-J. Lee, T. Noda, A. Islam, *ACS Energy Lett.* **2018**, *3*, 1584.
- [3] W. Liao, D. Zhao, Y. Yu, C. R. Grice, C. Wang, A. J. Cimaroli, P. Schulz, W. Meng, K. Zhu, R. G. Xiong, Y. Yan, *Adv Mater* **2016**, *28*, 9333.
- [4] Z. Zhu, C. C. Chueh, N. Li, C. Mao, A. K. Y. Jen, *Adv. Mater.* **2018**, *30*, 1703800.



- [5] S. J. Lee, S. S. Shin, Y. C. Kim, D. Kim, T. K. Ahn, J. H. Noh, J. Seo, S. I. Seok, *J. Am. Chem. Soc.* **2016**, *138*, 3974.
- [6] E. Jokar, C.-H. Chien, A. Fathi, M. Rameez, Y.-H. Chang, E. W.-G. Diau, *Energy Environ. Sci.* **2018**, *11*, 2353.
- [7] C. Liu, J. Tu, X. Hu, Z. Huang, X. Meng, J. Yang, X. Duan, L. Tan, Z. Li, Y. Chen, *Adv. Funct. Mater.* **2019**, *29*, 1808059.
- [8] X. Meng, Y. Wang, J. Lin, X. Liu, X. He, J. Barbaud, T. Wu, T. Noda, X. Yang, L. Han, *Joule* **2020**, *4*, 902.
- [9] S. Shahbazi, M.-Y. Li, A. Fathi, E. W.-G. Diau, *ACS Energy Lett.* **2020**, *5*, 2508.
- [10] C. Wang, F. Gu, Z. Zhao, H. Rao, Y. Qiu, Z. Cai, G. Zhan, X. Li, B. Sun, X. Yu, B. Zhao, Z. Liu, Z. Bian, C. Huang, *Adv. Mater.* **2020**, *32*, 1907623.
- [11] X. Liu, T. Wu, J.-Y. Chen, X. Meng, X. He, T. Noda, H. Chen, X. Yang, H. Segawa, Y. Wang, L. Han, *Energy Environ. Sci.* **2020**, *13*, 2896.
